# Supplementary material for: Lab-on-a-Drone: remote voltammetric analysis of lead in water with real-time data transmission
Source: Royal Society of Chemistry journal article supplement (doi:10.1039/d3ay01088k), 2023-01-01
Supplement: d3ay01088k1.pdf [file d3ay01088k1.pdf]

ARTICLE

Received 00th January 20xx,  
Accepted 00th January 20xx

DOI: 10.1039/x0xx00000x

## Lab-on-a-Drone: Remote voltammetric analysis of lead in water with real-time data transmission

João Paulo B. de Almeida<sup>1</sup>, Vinicius de A. Carvalho<sup>1</sup>, Leandro P. da Silva<sup>1</sup>, Maysa L. do Nascimento<sup>1,2</sup>, Severino B. de Oliveira<sup>2</sup>, Matheus V. Maia<sup>3</sup>, Willian T. Suarez<sup>3</sup>, Carlos D. Garcia<sup>4</sup> and Vagner B. dos Santos<sup>1,\*</sup>

### Electronic Supplementary Information

<sup>1</sup>LIA<sup>3</sup> (Laboratório de Instrumentação e Automação em Analítica Aplicada) da Universidade Federal de Pernambuco- Recife-PE-Brazil.

<sup>2</sup>Universidade Federal Rural de Pernambuco- Recife-PE-Brazil.

<sup>3</sup>Universidade Federal de Viçosa-MG-Brazil,

<sup>4</sup>Clemson University- USA

\* vagner.bsantos@ufpe.br. Av. Jornalista Anibal Fernandes, s/nº, Cidade Universitária, Recife, PE, 50740-560, Brazil.

```

int Vs= 6; // Solenoid valve actuation pin
int Bd= 7; // Micro Water pump actuation pin
String corrente;
String potencial;
int package_nr = 0;
String valorpotencial [350]; // String vector to save potential values applied during voltammetry
String valorcorrente[350]; // String vector to save current values measured during voltammetry
int nm=0;
int contagem=0;
int voltametria=1; // Variable whose purpose is to identify whether the remote command to start electrochemical analysis was activated
int analise=0;
String maxcorrente= "0.999999999999"; //The value of this variable will be updated with the actual value of the peak current measured in the
voltammetry
String maxpotencial; // This variable will store the peak potential value
float correntedepico;
float concentracao; // It stores the concentration value calculated by equation derived from linear regression
float cb= 1.3;
float vi;

```

Scheme S1. Part of the algorithm used to declare some variables.

```

for (int i = 0; i < package.nr_of_subpackages; i++){
PrintSubpackage(package.subpackages[i]);
if (nm>239){// this condition imposes that only the data measured after the pre-treatment step will be transmitted
if(i==0){
valorpotencial[contagem]=potencial;
}
if(i==1){
valorcorrente[contagem]=corrente;
if(valorcorrente[contagem].substring(0,1)!="-"){
if(valorcorrente[contagem].substring(7,9)<maxcorrente.substring(7,9)){
maxcorrente=valorcorrente[contagem];
maxpotencial=valorpotencial[contagem];
}
if(valorcorrente[contagem].substring(7,9)==maxcorrente.substring(7,9)){
if(valorcorrente[contagem].substring(0,5)>maxcorrente.substring(0,5)){
maxcorrente=valorcorrente[contagem];
maxpotencial=valorpotencial[contagem];
} } }
contagem=contagem +1;
} } }
nm=nm+package.nr_of_subpackages-1;

```

Scheme S2. Part of the algorithm developed to determine the peak potential and peak current measured in the voltammetric analysis.

```

correntedepico=((maxcorrente.substring(0,5).toFloat())*pow(10.0,((maxcorrente.substring(8,9).toFloat()*(-1))))*pow(10,6));
vi=correntedepico-cb;// This line subtracts the measured peak current from the peak current of the supporting electrolyte, so: vi=(measured peak current)-1.3, both in  $\mu\text{A}$ .
concentration= (28.81*vi)-(8.73); // Equation concerning the linear regression developed to SWASV
// The above mentioned equation is derived from the linear regression of the calibration curve performed for SWASV of lead samples:  $Y=0.302+0.0347*X$ 
//Y is the current in  $\mu\text{A}$ , and X is the lead concentration in  $\mu\text{g/L}$ .

```

Scheme S3. Algorithm developed to supply the concentration of  $\text{Pb}^{2+}$  / ( $\mu\text{g L}^{-1}$ ) in real time. For this, the peak current and linear equation obtained in Figure 4 of SWASV were used.

```

void serverWEB() { // This piece of code is responsible for creating the web server and displaying the data measured in the voltammetry on the smartphone screen

if (client) {
Serial.println("new client");
String currentLine = "";
while (client.connected()) {
if (client.available()) {
char t = client.read();
Serial.write(t);
if (t == '\n') {

if (currentLine.length() == 0) {

client.println("HTTP/1.1 200 OK");
client.println("Content-type:text/html");
client.println();
client.print ("      Sampling and analysis system <br><br><br>");
client.print("Click <a href=\"/H\">here</a> to turn on the BD <br>");
client.print("Click <a href=\"/L\">here</a> to turn off the BD<br><br>");
client.print("Click <a href=\"/F\">here</a> to turn on the VS <br>");
client.print("Click <a href=\"/D\">here</a> to turn off the VS<br><br>");
client.print("Click <a href=\"/I\">here</a> to start voltammetry <br><br>");
if(analise==1){
client.print("Data measured using cyclic voltammetry <br><br>");
for( int k=0; k<291; k++){
client.print(k+1);
client.print(" Potential(V): ");
client.print(valorpotencial[k]);
client.print("      Current(A) : ");
client.print(valorcorrente[k]);
client.println("<br>");
}
}

client.println();
break;
}
else {
currentLine = "";
}
}
else if (t != '\r') {
currentLine += t;
}
}

if (currentLine.endsWith("GET /H")) {
digitalWrite(Bd, HIGH);
}
if (currentLine.endsWith("GET /L")) {
digitalWrite(Bd, LOW);
}
if (currentLine.endsWith("GET /F")) {
digitalWrite(Vs, HIGH);
}
if (currentLine.endsWith("GET /D")) {
digitalWrite(Vs, LOW);
}
if (currentLine.endsWith("GET /I")) {
analise=1;
}
}
}
}
client.stop();
Serial.println("client disconnected");
}
}
}

```

Scheme S4. Algorithm to control the potentiostat and the sampling system, as well as display the measured data employing cyclic voltammetry and Wi-Fi data transmission to a smartphone.

```

void serverWEB() { // This piece of code is responsible for creating the web server and displaying the data measured in the voltammetry on the smartphone screen
if (client) {
  Serial.println("new client");
  String currentLine = "";
  while (client.connected()) {
    if (client.available()) {
      char t = client.read();
      Serial.write(t);
      if (t == '\n') {
        if (currentLine.length() == 0) {
          client.println("HTTP/1.1 200 OK");
          client.println("Content-type:text/html");
          client.println();
          client.print("      Sampling and analysis system <br><br><br>");
          client.print("Click <a href=\"/H\">here</a> to turn on the BD <br>");
          client.print("Click <a href=\"/L\">here</a> to turn off the BD <br><br>");
          client.print("Click <a href=\"/F\">here</a> to turn on the VS <br>");
          client.print("Click <a href=\"/D\">here</a> to turn off the VS <br><br>");
          client.print("Click <a href=\"/I\">here</a> to start voltammetry <br><br>");
          if(analise==1){
            client.print("Data measured using square wave voltammetry <br><br>");
            for( int k=0; k<125; k++){
              client.print(k+1);
            }
            client.print(" Potential(V): ");
            client.print(valorpotencial[k]);
            client.print("      Current(A) : ");
            client.print(valorcorrente[k]);
            client.println("<br>");
          }
          client.print(" Measured peak current (A): ");
          client.print(maxcorrente);
          client.print(" , Peak potential (V): ");
          client.print(maxpotencial);
          client.println("<br>");
          client.print(" Lead concentration ( $\mu\text{g L}^{-1}$ ): ");
          client.println(concentracao,10);
        }
        client.println();
        break;
      }
      else {
        currentLine = "";
      }
    }
    else if (t != '\r') {
      currentLine += t;
    }
  }
  if (currentLine.endsWith("GET /H")) {
    digitalWrite(Bd, HIGH);
  }
  if (currentLine.endsWith("GET /L")) {
    digitalWrite(Bd, LOW);
  }
  if (currentLine.endsWith("GET /F")) {
    digitalWrite(Vs, HIGH);
  }
  if (currentLine.endsWith("GET /D")) {
    digitalWrite(Vs, LOW);
  }
  if (currentLine.endsWith("GET /I")) {
    analise=1;
  }
}
}
client.stop();
Serial.println("client disconnected");
}
}

```

Scheme S5. Part of the algorithm developed to control the potentiostat and the sampling system, as well as display the measured data employing SWASV in the smartphone screen such as: the peak current, peak potential and concentration of  $\text{Pb}^{2+}$  in  $\mu\text{g L}^{-1}$  and Wi-Fi data transmission to a Smartphone.

```

void serverWEB() { // This piece of code is responsible for creating the web server and displaying the data measured in the voltammetry on the smartphone screen
if (client) {
Serial.println("new client");
String currentLine = "";
while (client.connected()) {
if (client.available()) {
char t = client.read();
Serial.write(t);
if (t == '\n') {
if (currentLine.length() == 0) {
client.println("HTTP/1.1 200 OK");
client.println("Content-type:text/html");
client.println();
client.print ("          Sampling and analysis system <br><br><br>");
client.print("Click <a href=\"/H\">here</a> to turn on the BD <br>");
client.print("Click <a href=\"/L\">here</a> to turn off the BD<br><br>");
client.print("Click <a href=\"/F\">here</a> to turn on the VS <br>");
client.print("Click <a href=\"/D\">here</a> to turn off the VS<br><br>");
client.print("Click <a href=\"/I\">here</a> to start voltammetry <br><br>");
if(analise==1){
client.print("Data measured using differential pulse voltammetry <br><br>");
for( int k=0; k<240; k++){
client.print(k+1);
client.print(" Potential(V): ");
client.print(valorpotencial[k]);
client.print("          Current(A) : ");
client.print(valorcorrente[k]);
client.println("<br>");
}
client.print(" Measured peak current (A): ");
client.print(maxcorrente);
client.print(" , Peak potential (V): ");
client.print(maxpotencial);
client.println("<br>");
}
client.println();
break;
}
else {
currentLine = "";
}
}
else if (t != '\r') {
currentLine += t;
}
if (currentLine.endsWith("GET /H")) {
digitalWrite(Bd, HIGH);
}
if (currentLine.endsWith("GET /L")) {
digitalWrite(Bd, LOW);
}
if (currentLine.endsWith("GET /F")) {
digitalWrite(Vs, HIGH);
}
if (currentLine.endsWith("GET /D")) {
digitalWrite(Vs, LOW);
}
if (currentLine.endsWith("GET /I")) {
analise=1;
} } }
client.stop();
Serial.println("client disconnected");
}}

```

Scheme S6. Algorithm to control the potentiostat and the sampling system, as well as display the measured data employing DPASV and Wi-Fi data transmission to a Smartphone.

Table S1. Data transmitted by Wi-Fi regards to 1.0 mmol/L  $K_4Fe(CN)_6$  solution in 0.1 mol L<sup>-1</sup> KCl employing cyclic voltammetry using the Lab-on-a-Drone. The scan rate was 100 mV s<sup>-1</sup> from a potential window from -0.2 V to 0.9 V vs E Ag/AgCl.

| Potential (V) | Current(A)    | Potential (V) | Current(A)  | Potential (V) | Current(A)  |
|---------------|---------------|---------------|-------------|---------------|-------------|
| -0.1999       | -0.000006135  | 0.2138        | 0.000003199 | 0.6275        | 0.00001038  |
| -0.1923       | -0.000005978  | 0.2213        | 0.000004637 | 0.635         | 0.00001029  |
| -0.1848       | -0.000005848  | 0.2289        | 0.000006314 | 0.6425        | 0.0000102   |
| -0.1773       | -0.000005729  | 0.2364        | 0.000008232 | 0.6501        | 0.00001011  |
| -0.1698       | -0.000005617  | 0.2439        | 0.00001034  | 0.6576        | 0.00001002  |
| -0.1622       | -0.000005512  | 0.2514        | 0.00001257  | 0.6651        | 0.000009943 |
| -0.1547       | -0.000005411  | 0.2589        | 0.00001484  | 0.6726        | 0.000009866 |
| -0.1472       | -0.000005316  | 0.2665        | 0.00001702  | 0.6801        | 0.000009796 |
| -0.1397       | -0.000005222  | 0.274         | 0.00001905  | 0.6877        | 0.000009723 |
| -0.1322       | -0.000005134  | 0.2815        | 0.00002082  | 0.6952        | 0.000009656 |
| -0.1246       | -0.000005047  | 0.289         | 0.00002225  | 0.7027        | 0.000009593 |
| -0.1171       | -0.000004959  | 0.2966        | 0.00002329  | 0.7102        | 0.00000953  |
| -0.1096       | -0.000004875  | 0.3041        | 0.00002396  | 0.7178        | 0.000009478 |
| -0.1021       | -0.000004795  | 0.3116        | 0.00002426  | 0.7253        | 0.000009422 |
| -0.09455      | -0.000004714  | 0.3191        | 0.00002425  | 0.7328        | 0.000009373 |
| -0.08703      | -0.000004637  | 0.3266        | 0.00002399  | 0.7403        | 0.00000932  |
| -0.07951      | -0.00000456   | 0.3342        | 0.00002353  | 0.7478        | 0.000009275 |
| -0.07199      | -0.000004487  | 0.3417        | 0.00002295  | 0.7554        | 0.000009226 |
| -0.06447      | -0.00000441   | 0.3492        | 0.00002229  | 0.7629        | 0.00000918  |
| -0.05695      | -0.00000434   | 0.3567        | 0.00002159  | 0.7704        | 0.000009138 |
| -0.04943      | -0.000004266  | 0.3642        | 0.00002088  | 0.7779        | 0.000009096 |
| -0.0419       | -0.000004196  | 0.3718        | 0.00002019  | 0.7854        | 0.000009054 |
| -0.03438      | -0.00000413   | 0.3793        | 0.00001952  | 0.793         | 0.000009019 |
| -0.02686      | -0.00000406   | 0.3868        | 0.00001888  | 0.8005        | 0.000008981 |
| -0.01934      | -0.000003993  | 0.3943        | 0.00001827  | 0.808         | 0.000008946 |
| -0.01182      | -0.000003927  | 0.4019        | 0.0000177   | 0.8155        | 0.000008914 |
| -0.004298     | -0.000003864  | 0.4094        | 0.00001717  | 0.8231        | 0.000008886 |
| 0.003223      | -0.000003797  | 0.4169        | 0.00001667  | 0.8306        | 0.000008858 |
| 0.01074       | -0.000003734  | 0.4244        | 0.00001622  | 0.8381        | 0.000008837 |
| 0.01827       | -0.000003671  | 0.4319        | 0.00001578  | 0.8456        | 0.000008813 |
| 0.02579       | -0.000003608  | 0.4395        | 0.00001539  | 0.8531        | 0.000008792 |
| 0.03331       | -0.000003545  | 0.447         | 0.00001501  | 0.8607        | 0.000008767 |
| 0.04083       | -0.000003482  | 0.4545        | 0.00001466  | 0.8682        | 0.000008753 |
| 0.04835       | -0.000003419  | 0.462         | 0.00001434  | 0.8757        | 0.000008736 |
| 0.05587       | -0.000003356  | 0.4695        | 0.00001403  | 0.8832        | 0.000008722 |
| 0.06339       | -0.00000329   | 0.4771        | 0.00001375  | 0.8907        | 0.000008704 |
| 0.07092       | -0.000003227  | 0.4846        | 0.00001348  | 0.8832        | 0.000008529 |
| 0.07844       | -0.000003157  | 0.4921        | 0.00001322  | 0.8757        | 0.000008403 |
| 0.08596       | -0.000003087  | 0.4996        | 0.00001298  | 0.8682        | 0.000008298 |
| 0.09348       | -0.000003013  | 0.5072        | 0.00001276  | 0.8607        | 0.000008204 |
| 0.101         | -0.000002933  | 0.5147        | 0.00001255  | 0.8531        | 0.000008116 |
| 0.1085        | -0.000002845  | 0.5222        | 0.00001234  | 0.8456        | 0.000008036 |
| 0.116         | -0.000002751  | 0.5297        | 0.00001215  | 0.8381        | 0.000007959 |
| 0.1236        | -0.000002642  | 0.5372        | 0.00001197  | 0.8306        | 0.000007889 |
| 0.1311        | -0.000002516  | 0.5448        | 0.00001181  | 0.8231        | 0.000007822 |
| 0.1386        | -0.000002369  | 0.5523        | 0.00001164  | 0.8155        | 0.000007759 |
| 0.1461        | -0.000002191  | 0.5598        | 0.00001149  | 0.808         | 0.000007696 |
| 0.1537        | -0.000001977  | 0.5673        | 0.00001134  | 0.8005        | 0.000007637 |
| 0.1612        | -0.000001711  | 0.5748        | 0.0000112   | 0.793         | 0.000007577 |
| 0.1687        | -0.000001379  | 0.5824        | 0.00001107  | 0.7854        | 0.000007521 |
| 0.1762        | -0.000000966  | 0.5899        | 0.00001094  | 0.7779        | 0.000007462 |
| 0.1837        | -0.0000004445 | 0.5974        | 0.00001082  | 0.7704        | 0.000007402 |
| 0.1913        | 0.0000001995  | 0.6049        | 0.0000107   | 0.7629        | 0.000007346 |
| 0.1988        | 0.000001004   | 0.6125        | 0.00001059  | 0.7554        | 0.00000729  |
| 0.2063        | 0.000001991   | 0.62          | 0.00001049  | 0.7478        | 0.000007234 |

## Continuation of the Table S1

| Potential(V) | Current(A)  | Potential(V) | Current(A)    | Potential(V) | Current(A)   |
|--------------|-------------|--------------|---------------|--------------|--------------|
| 0.7403       | 0.000007182 | 0.3793       | 0.000004448   | 0.01827      | -0.000009628 |
| 0.7328       | 0.000007129 | 0.3718       | 0.000004207   | 0.01074      | -0.000009422 |
| 0.7253       | 0.000007077 | 0.3642       | 0.000003906   | 0.003223     | -0.000009226 |
| 0.7178       | 0.000007028 | 0.3567       | 0.000003535   | -0.004298    | -0.000009044 |
| 0.7102       | 0.000006982 | 0.3492       | 0.000003073   | -0.01182     | -0.000008869 |
| 0.7027       | 0.000006937 | 0.3417       | 0.000002481   | -0.01934     | -0.000008701 |
| 0.6952       | 0.000006891 | 0.3342       | 0.000001757   | -0.02686     | -0.00000854  |
| 0.6877       | 0.000006842 | 0.3266       | 0.000000861   | -0.03438     | -0.000008393 |
| 0.6801       | 0.0000068   | 0.3191       | -0.0000002345 | -0.0419      | -0.000008246 |
| 0.6726       | 0.000006755 | 0.3116       | -0.000001557  | -0.04943     | -0.000008109 |
| 0.6651       | 0.000006709 | 0.3041       | -0.000003118  | -0.05695     | -0.00000798  |
| 0.6576       | 0.000006667 | 0.2966       | -0.00000491   | -0.06447     | -0.000007854 |
| 0.6501       | 0.000006622 | 0.289        | -0.000006909  | -0.07199     | -0.000007735 |
| 0.6425       | 0.00000658  | 0.2815       | -0.000009061  | -0.07951     | -0.000007623 |
| 0.635        | 0.000006534 | 0.274        | -0.00001132   | -0.08703     | -0.000007511 |
| 0.6275       | 0.000006489 | 0.2665       | -0.00001358   | -0.09455     | -0.000007409 |
| 0.62         | 0.000006447 | 0.2589       | -0.00001571   | -0.1021      | -0.000007308 |
| 0.6125       | 0.000006401 | 0.2514       | -0.00001761   | -0.1096      | -0.000007213 |
| 0.6049       | 0.000006359 | 0.2439       | -0.00001922   | -0.1171      | -0.000007122 |
| 0.5974       | 0.000006317 | 0.2364       | -0.00002043   | -0.1246      | -0.000007035 |
| 0.5899       | 0.000006275 | 0.2289       | -0.00002126   | -0.1322      | -0.000006951 |
| 0.5824       | 0.00000623  | 0.2213       | -0.00002168   | -0.1397      | -0.00000687  |
| 0.5748       | 0.000006188 | 0.2138       | -0.00002174   | -0.1472      | -0.000006793 |
| 0.5673       | 0.000006146 | 0.2063       | -0.00002152   | -0.1547      | -0.000006716 |
| 0.5598       | 0.000006104 | 0.1988       | -0.00002109   | -0.1622      | -0.00000665  |
| 0.5523       | 0.000006058 | 0.1913       | -0.0000205    | -0.1698      | -0.000006583 |
| 0.5448       | 0.000006016 | 0.1837       | -0.00001982   | -0.1773      | -0.00000652  |
| 0.5372       | 0.000005974 | 0.1762       | -0.0000191    | -0.1848      | -0.000006461 |
| 0.5297       | 0.000005932 | 0.1687       | -0.00001835   | -0.1923      | -0.000006405 |
| 0.5222       | 0.00000589  | 0.1612       | -0.00001761   | -0.1999      | -0.000006349 |
| 0.5147       | 0.000005845 | 0.1537       | -0.0000169    |              |              |
| 0.5072       | 0.000005799 | 0.1461       | -0.00001623   |              |              |
| 0.4996       | 0.000005757 | 0.1386       | -0.00001558   |              |              |
| 0.4921       | 0.000005712 | 0.1311       | -0.00001499   |              |              |
| 0.4846       | 0.000005666 | 0.1236       | -0.00001443   |              |              |
| 0.4771       | 0.000005621 | 0.116        | -0.00001391   |              |              |
| 0.4695       | 0.000005575 | 0.1085       | -0.00001343   |              |              |
| 0.462        | 0.000005523 | 0.101        | -0.00001298   |              |              |
| 0.4545       | 0.00000547  | 0.09348      | -0.00001256   |              |              |
| 0.447        | 0.000005414 | 0.08596      | -0.00001218   |              |              |
| 0.4395       | 0.000005355 | 0.07844      | -0.00001181   |              |              |
| 0.4319       | 0.000005288 | 0.07092      | -0.00001147   |              |              |
| 0.4244       | 0.000005215 | 0.06339      | -0.00001116   |              |              |
| 0.4169       | 0.000005134 | 0.05587      | -0.00001086   |              |              |
| 0.4094       | 0.00000504  | 0.04835      | -0.00001058   |              |              |
| 0.4019       | 0.000004928 | 0.04083      | -0.00001032   |              |              |
| 0.3943       | 0.000004798 | 0.03331      | -0.00001008   |              |              |
| 0.3868       | 0.000004641 | 0.02579      | -0.000009845  |              |              |

Table S2. Results of the in situ analysis of Pb<sup>2+</sup> using a Lab-on-a-Drone compared to the results obtained using a ICP-OES in laboratory.

| Spiked water sample | Lab-on-a-Drone <sup>1</sup> /<br>(mg L <sup>-1</sup> ) (± SD) | ICP-OES /<br>(mg L <sup>-1</sup> ) (± SD) | <sup>2</sup> RE (%) | <sup>3</sup> T-Test |
|---------------------|---------------------------------------------------------------|-------------------------------------------|---------------------|---------------------|
| 1                   | 6.37 ± 0.06                                                   | 6.77 ± 0.01                               | - 5.91              | 0.006               |
| 2                   | 6.53 ± 0.22                                                   | 6.50 ± 0.02                               | 0.46                | 0.864               |
| 3                   | 6.91 ± 0.22                                                   | 6.98 ± 0.01                               | -1.00               | 0.020               |

<sup>1</sup>The spiked water samples were diluted to fit in the linear range of the SWASV methods employed in the Lab-on-a-Drone.

<sup>2</sup>Relative error. <sup>2</sup>tabulated = 4.303 (*n* = 3)



Table S3. Data transmitted by Wifi regards to a spiked water sample with  $30 \mu\text{g L}^{-1}$  of  $\text{Pb}^{2+}$  employing SWASV using the Lab-on-a-Drone. SWASV parameters: deposition potential =  $-1.4 \text{ V}$ , time of deposition =  $120 \text{ s}$ ,  $f = 10 \text{ Hz}$ ,  $a = 50 \text{ mV}$ ,  $\Delta E_s = 5 \text{ mV}$ .

| Potential (V) | Current (A) | Potential (V) | Current (A) | Potential (V) | Current (A) |
|---------------|-------------|---------------|-------------|---------------|-------------|
| -0.8          | 0.00000147  | -0.563        | 0.000001988 | -0.3261       | 0.000001795 |
| -0.7951       | 0.000001589 | -0.5582       | 0.000002037 | -0.3213       | 0.000001771 |
| -0.7903       | 0.00000154  | -0.5534       | 0.000002107 | -0.3164       | 0.000001752 |
| -0.7854       | 0.000001491 | -0.5485       | 0.000002156 | -0.3116       | 0.000001728 |
| -0.7806       | 0.000001435 | -0.5437       | 0.000002226 | -0.3068       | 0.000001706 |
| -0.7758       | 0.000001393 | -0.5389       | 0.000002296 | -0.3019       | 0.000001692 |
| -0.7709       | 0.000001351 | -0.534        | 0.000002352 | -0.2971       | 0.00000168  |
| -0.7661       | 0.000001309 | -0.5292       | 0.000002408 | -0.2923       | 0.000001662 |
| -0.7613       | 0.000001274 | -0.5243       | 0.000002464 | -0.2874       | 0.000001648 |
| -0.7564       | 0.000001239 | -0.5195       | 0.00000252  | -0.2826       | 0.000001634 |
| -0.7516       | 0.000001218 | -0.5147       | 0.000002555 | -0.2778       | 0.000001617 |
| -0.7468       | 0.000001197 | -0.5098       | 0.000002597 | -0.2729       | 0.000001605 |
| -0.7419       | 0.000001176 | -0.505        | 0.000002625 | -0.2681       | 0.000001597 |
| -0.7371       | 0.000001155 | -0.5002       | 0.000002653 | -0.2632       | 0.000001592 |
| -0.7323       | 0.000001127 | -0.4953       | 0.000002674 | -0.2584       | 0.000001582 |
| -0.7274       | 0.00000112  | -0.4905       | 0.000002667 | -0.2536       | 0.000001581 |
| -0.7226       | 0.000001113 | -0.4857       | 0.000002674 | -0.2487       | 0.000001577 |
| -0.7178       | 0.000001099 | -0.4808       | 0.00000266  | -0.2439       | 0.000001575 |
| -0.7129       | 0.000001092 | -0.476        | 0.000002639 | -0.2391       | 0.000001568 |
| -0.7081       | 0.000001085 | -0.4712       | 0.000002632 | -0.2342       | 0.000001571 |
| -0.7032       | 0.000001085 | -0.4663       | 0.000002604 | -0.2294       | 0.00000157  |
| -0.6984       | 0.000001071 | -0.4615       | 0.000002583 | -0.2246       | 0.00000157  |
| -0.6936       | 0.000001078 | -0.4567       | 0.000002548 | -0.2197       | 0.000001572 |
| -0.6887       | 0.000001078 | -0.4518       | 0.000002523 | -0.2149       | 0.000001575 |
| -0.6839       | 0.000001092 | -0.447        | 0.000002485 | -0.2101       | 0.000001581 |
| -0.6791       | 0.000001092 | -0.4421       | 0.000002453 | -0.2052       | 0.000001583 |
| -0.6742       | 0.000001106 | -0.4373       | 0.000002422 | -0.2004       | 0.000001591 |
| -0.6694       | 0.000001106 | -0.4325       | 0.000002387 |               |             |
| -0.6646       | 0.000001127 | -0.4276       | 0.000002355 |               |             |
| -0.6597       | 0.000001141 | -0.4228       | 0.00000232  |               |             |
| -0.6549       | 0.000001169 | -0.418        | 0.000002285 |               |             |
| -0.6501       | 0.000001183 | -0.4131       | 0.00000225  |               |             |
| -0.6452       | 0.000001211 | -0.4083       | 0.000002221 |               |             |
| -0.6404       | 0.000001239 | -0.4035       | 0.000002186 |               |             |
| -0.6356       | 0.000001267 | -0.3986       | 0.000002154 |               |             |
| -0.6307       | 0.000001302 | -0.3938       | 0.00000213  |               |             |
| -0.6259       | 0.000001344 | -0.389        | 0.000002103 |               |             |
| -0.6211       | 0.000001372 | -0.3841       | 0.000002072 |               |             |
| -0.6162       | 0.000001407 | -0.3793       | 0.00000205  |               |             |
| -0.6114       | 0.000001456 | -0.3745       | 0.000002026 |               |             |
| -0.6065       | 0.000001505 | -0.3696       | 0.000002002 |               |             |
| -0.6017       | 0.000001547 | -0.3648       | 0.000001974 |               |             |
| -0.5969       | 0.000001589 | -0.36         | 0.000001952 |               |             |
| -0.592        | 0.000001645 | -0.3551       | 0.000001927 |               |             |
| -0.5872       | 0.000001694 | -0.3503       | 0.000001902 |               |             |
| -0.5824       | 0.000001736 | -0.3454       | 0.000001879 |               |             |
| -0.5775       | 0.000001799 | -0.3406       | 0.000001854 |               |             |
| -0.5727       | 0.000001862 | -0.3358       | 0.000001835 |               |             |
| -0.5679       | 0.000001925 | -0.3309       | 0.000001814 |               |             |

Table S4. Evaluation of ions commonly studied for metal quantification in environmental water samples by Voltammetry.

| Ions                          | Interference / (%) |
|-------------------------------|--------------------|
| K <sup>+</sup>                | 2.74 ± 0.10        |
| Na <sup>+</sup>               | 4.09 ± 0.15        |
| Ca <sup>2+</sup>              | 2.65 ± 0.18        |
| Ba <sup>2+</sup>              | 2.93 ± 0.20        |
| Cu <sup>2+</sup>              | 1.40 ± 0.12        |
| SO <sub>4</sub> <sup>2-</sup> | 0.59 ± 0.15        |
| PO <sub>4</sub> <sup>3-</sup> | 4.70 ± 0.08        |
| CO <sub>3</sub> <sup>2-</sup> | 4.81 ± 0.06        |
| Cl <sup>-</sup>               | 2.03 ± 0.15        |
| NO <sub>3</sub> <sup>-</sup>  | 1.42 ± 0.22        |

Table S5. Data transmitted by Wifi regards to a spiked water sample with  $65 \mu\text{g L}^{-1}$  of  $\text{Pb}^{2+}$  employing DPASV using the Lab-on-a-Drone. DPASV parameters: deposition potential = - 1.4 V, time of deposition = 120 s, interval pulse = 200 ms, pulse width = 40 ms,  $a = 10 \text{ mV}$ ,  $\Delta E_s = 4 \text{ mV}$ .

| Potential(V) | Current(A)  | Potential(V) | Current(A)  | Potential(V) | Current(A)  |
|--------------|-------------|--------------|-------------|--------------|-------------|
| -0.8999      | 0.000000112 | -0.7156      | 0.000000112 | -0.5313      | 0.000003108 |
| -0.8961      | 0.000000112 | -0.7118      | 0.000000084 | -0.5276      | 0.000003892 |
| -0.8924      | 0.000000084 | -0.7081      | 0.000000084 | -0.5238      | 0.000004956 |
| -0.8886      | 0.000000084 | -0.7043      | 0.000000084 | -0.52        | 0.000006328 |
| -0.8848      | 0.000000084 | -0.7006      | 0.000000084 | -0.5163      | 0.000008008 |
| -0.8811      | 0.000000112 | -0.6968      | 0.000000112 | -0.5125      | 0.00001009  |
| -0.8773      | 0.000000084 | -0.693       | 0.000000084 | -0.5088      | 0.00001267  |
| -0.8736      | 0.000000112 | -0.6893      | 0.000000084 | -0.505       | 0.00001567  |
| -0.8698      | 0.000000084 | -0.6855      | 0.000000112 | -0.5012      | 0.0000192   |
| -0.866       | 0.000000112 | -0.6818      | 0.000000084 | -0.4975      | 0.00002327  |
| -0.8623      | 0.000000084 | -0.678       | 0.000000112 | -0.4937      | 0.00002787  |
| -0.8585      | 0.000000112 | -0.6742      | 0.000000084 | -0.49        | 0.000033    |
| -0.8547      | 0.000000112 | -0.6705      | 0.000000112 | -0.4862      | 0.00003867  |
| -0.851       | 0.000000084 | -0.6667      | 0.000000084 | -0.4824      | 0.00004458  |
| -0.8472      | 0.000000112 | -0.663       | 0.000000084 | -0.4787      | 0.00005047  |
| -0.8435      | 0.000000084 | -0.6592      | 0.000000112 | -0.4749      | 0.00005659  |
| -0.8397      | 0.000000112 | -0.6554      | 0.000000084 | -0.4712      | 0.00006237  |
| -0.8359      | 0.000000084 | -0.6517      | 0.000000084 | -0.4674      | 0.00006783  |
| -0.8322      | 0.000000112 | -0.6479      | 0.000000112 | -0.4636      | 0.00007279  |
| -0.8284      | 0.000000084 | -0.6442      | 0.000000112 | -0.4599      | 0.000077    |
| -0.8247      | 0.000000112 | -0.6404      | 0.000000112 | -0.4561      | 0.00008018  |
| -0.8209      | 0.000000084 | -0.6366      | 0.000000112 | -0.4524      | 0.00008176  |
| -0.8171      | 0.000000112 | -0.6329      | 0.000000112 | -0.4486      | 0.00008084  |
| -0.8134      | 0.000000112 | -0.6291      | 0.000000112 | -0.4448      | 0.00007538  |
| -0.8096      | 0.000000112 | -0.6253      | 0.000000112 | -0.4411      | 0.00006126  |
| -0.8059      | 0.000000112 | -0.6216      | 0.000000084 | -0.4373      | 0.00004236  |
| -0.8021      | 0.000000112 | -0.6178      | 0.000000112 | -0.4336      | 0.00002657  |
| -0.7983      | 0.000000112 | -0.6141      | 0.00000014  | -0.4298      | 0.00001498  |
| -0.7946      | 0.000000112 | -0.6103      | 0.000000112 | -0.426       | 0.00000798  |
| -0.7908      | 0.000000084 | -0.6065      | 0.00000014  | -0.4223      | 0.000004312 |
| -0.7871      | 0.000000112 | -0.6028      | 0.00000014  | -0.4185      | 0.000002436 |
| -0.7833      | 0.000000112 | -0.599       | 0.00000014  | -0.4147      | 0.000001456 |
| -0.7795      | 0.000000112 | -0.5953      | 0.000000168 | -0.411       | 0.000000924 |
| -0.7758      | 0.000000112 | -0.5915      | 0.000000168 | -0.4072      | 0.000000658 |
| -0.772       | 0.000000112 | -0.5877      | 0.000000196 | -0.4035      | 0.00000049  |
| -0.7683      | 0.000000084 | -0.584       | 0.000000196 | -0.3997      | 0.000000385 |
| -0.7645      | 0.000000112 | -0.5802      | 0.000000224 | -0.3959      | 0.000000322 |
| -0.7607      | 0.000000084 | -0.5765      | 0.000000252 | -0.3922      | 0.000000294 |
| -0.757       | 0.000000112 | -0.5727      | 0.000000308 | -0.3884      | 0.000000266 |
| -0.7532      | 0.000000084 | -0.5689      | 0.000000364 | -0.3847      | 0.000000245 |
| -0.7495      | 0.000000112 | -0.5652      | 0.00000042  | -0.3809      | 0.000000238 |
| -0.7457      | 0.000000112 | -0.5614      | 0.000000504 | -0.3771      | 0.000000224 |
| -0.7419      | 0.000000112 | -0.5577      | 0.000000644 | -0.3734      | 0.000000217 |
| -0.7382      | 0.000000112 | -0.5539      | 0.000000756 | -0.3696      | 0.000000203 |
| -0.7344      | 0.000000084 | -0.5501      | 0.000000952 | -0.3659      | 0.000000203 |
| -0.7306      | 0.000000084 | -0.5464      | 0.000001204 | -0.3621      | 0.000000189 |
| -0.7269      | 0.000000084 | -0.5426      | 0.00000154  | -0.3583      | 0.000000189 |
| -0.7231      | 0.000000084 | -0.5389      | 0.000001932 | -0.3546      | 0.000000182 |
| -0.7194      | 0.000000112 | -0.5351      | 0.000002408 | -0.3508      | 0.000000182 |

## Continuation of the Table S5

| Potential(V) | Current(A)    | Potential(V) | Current(A)    |
|--------------|---------------|--------------|---------------|
| -0.3471      | 0.000000175   | -0.1628      | 0.00000009625 |
| -0.3433      | 0.000000175   | -0.159       | 0.0000000945  |
| -0.3395      | 0.000000168   | -0.1553      | 0.00000009275 |
| -0.3358      | 0.000000168   | -0.1515      | 0.00000009275 |
| -0.332       | 0.000000161   | -0.1477      | 0.00000009275 |
| -0.3283      | 0.000000154   | -0.144       | 0.00000009275 |
| -0.3245      | 0.000000154   | -0.1402      | 0.00000009187 |
| -0.3207      | 0.000000154   | -0.1365      | 0.00000009275 |
| -0.317       | 0.000000147   | -0.1327      | 0.00000009362 |
| -0.3132      | 0.000000147   | -0.1289      | 0.00000009362 |
| -0.3095      | 0.00000014    | -0.1252      | 0.00000009275 |
| -0.3057      | 0.000000147   | -0.1214      | 0.00000009275 |
| -0.3019      | 0.000000133   | -0.1177      | 0.00000009275 |
| -0.2982      | 0.000000133   | -0.1139      | 0.00000009187 |
| -0.2944      | 0.0000001295  | -0.1101      | 0.00000009187 |
| -0.2906      | 0.000000133   | -0.1064      | 0.00000009187 |
| -0.2869      | 0.000000126   | -0.1026      | 0.00000009275 |
| -0.2831      | 0.000000126   | -0.09885     | 0.000000091   |
| -0.2794      | 0.0000001225  | -0.09509     | 0.000000091   |
| -0.2756      | 0.000000119   | -0.09133     | 0.00000009012 |
| -0.2718      | 0.0000001225  | -0.08757     | 0.00000009012 |
| -0.2681      | 0.0000001155  | -0.08381     | 0.00000009012 |
| -0.2643      | 0.0000001155  | -0.08005     | 0.00000008969 |
| -0.2606      | 0.000000119   | -0.07629     | 0.00000008947 |
| -0.2568      | 0.000000112   | -0.07253     | 0.00000008947 |
| -0.253       | 0.000000112   | -0.06877     | 0.00000009034 |
| -0.2493      | 0.000000112   | -0.06501     | 0.00000008925 |
| -0.2455      | 0.0000001085  | -0.06125     | 0.00000008969 |
| -0.2418      | 0.000000112   | -0.05748     | 0.00000009034 |
| -0.238       | 0.000000112   | -0.05372     | 0.00000009034 |
| -0.2342      | 0.0000001085  | -0.04996     | 0.00000008991 |
| -0.2305      | 0.0000001085  | -0.0462      | 0.00000009012 |
| -0.2267      | 0.000000105   | -0.04244     | 0.00000009045 |
| -0.223       | 0.0000001085  | -0.03868     | 0.00000009012 |
| -0.2192      | 0.000000105   | -0.03492     | 0.00000009023 |
| -0.2154      | 0.000000105   | -0.03116     | 0.00000009067 |
| -0.2117      | 0.0000001015  | -0.0274      | 0.00000009078 |
| -0.2079      | 0.0000001015  | -0.02364     | 0.00000009155 |
| -0.2042      | 0.0000001015  | -0.01988     | 0.00000009012 |
| -0.2004      | 0.0000001015  | -0.01612     | 0.00000009177 |
| -0.1966      | 0.000000098   | -0.01236     | 0.00000009133 |
| -0.1929      | 0.00000009975 | -0.008596    | 0.00000009166 |
| -0.1891      | 0.000000098   | -0.004835    | 0.00000009231 |
| -0.1853      | 0.000000098   | -0.001074    | 0.00000009264 |
| -0.1816      | 0.000000098   |              |               |
| -0.1778      | 0.000000098   |              |               |
| -0.1741      | 0.0000000945  |              |               |
| -0.1703      | 0.0000000945  |              |               |
| -0.1665      | 0.0000000945  |              |               |

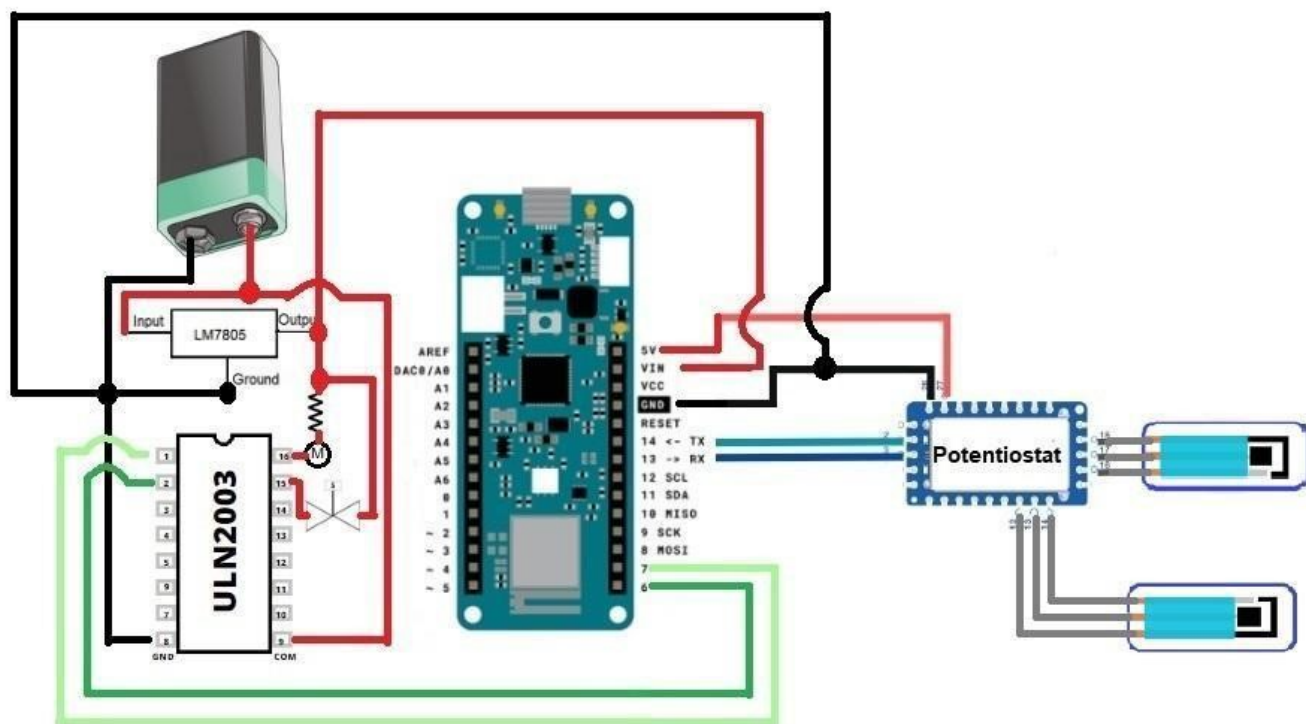

Figure S1. Electronic circuit to control the water sampling system and the electrochemical cell of the Lab-on-a-Drone to automatic control with real-time data transmission by Wi-Fi: the micropump (M), the solenoid valve (S), the miniaturized bipotentiostat (EmStat Pico) and the SP-BDDE.

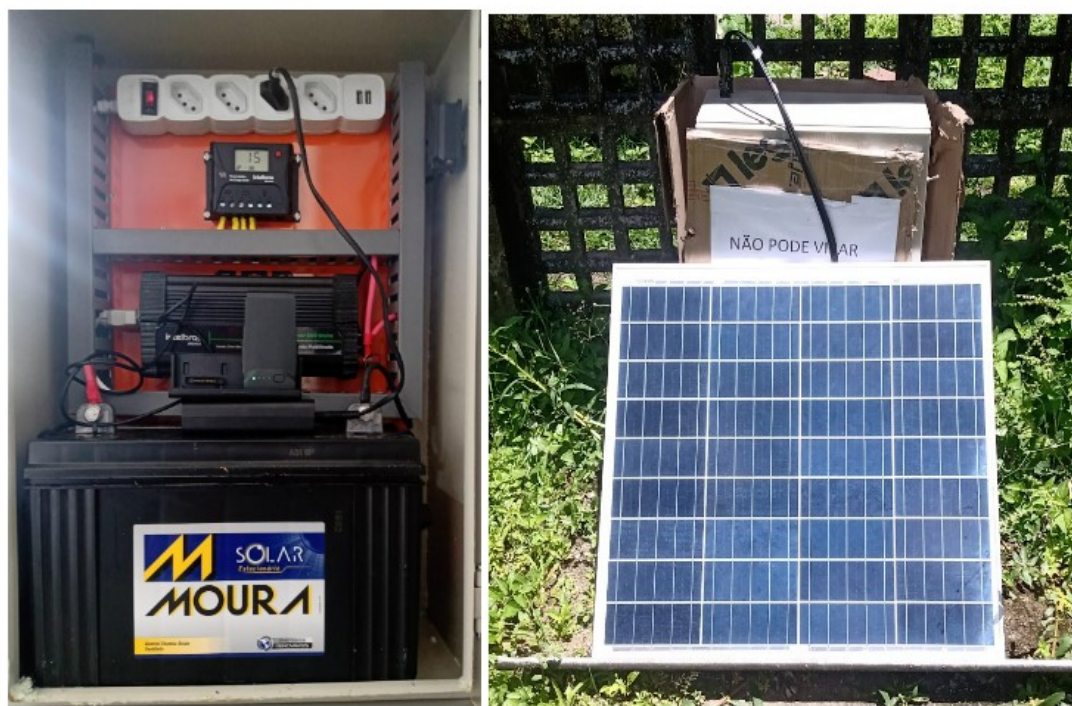

Figure S2. The solar system, a stationary battery of 12 V 100 A, a solar charge controller 12 V, and an inverter module 12 VDC to 127 VAC. The solar plate with 60 W is not shown.

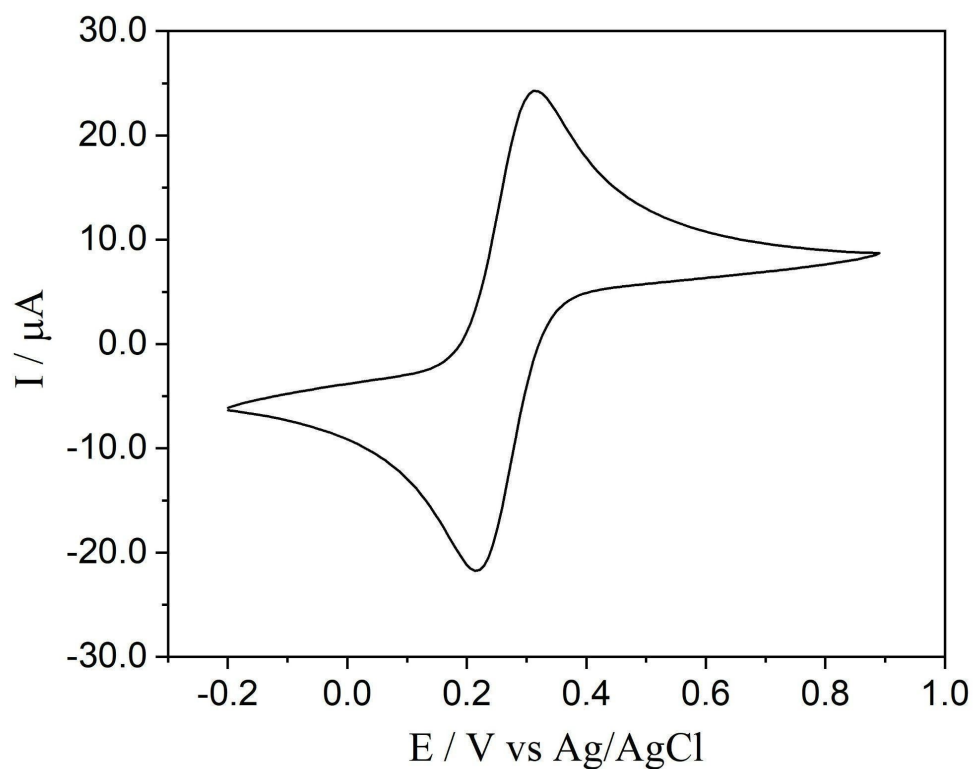

Figure S3. Voltammogram produced of a solution for determination of 1.0 mmol/L  $\text{K}_4\text{Fe}(\text{CN})_6$  solution in 0.1 mol  $\text{L}^{-1}$  KCl measured on SP-BDDE, with data transmitted by wifi (Table S1) from the Lab-on-a-Drone to a smartphone.

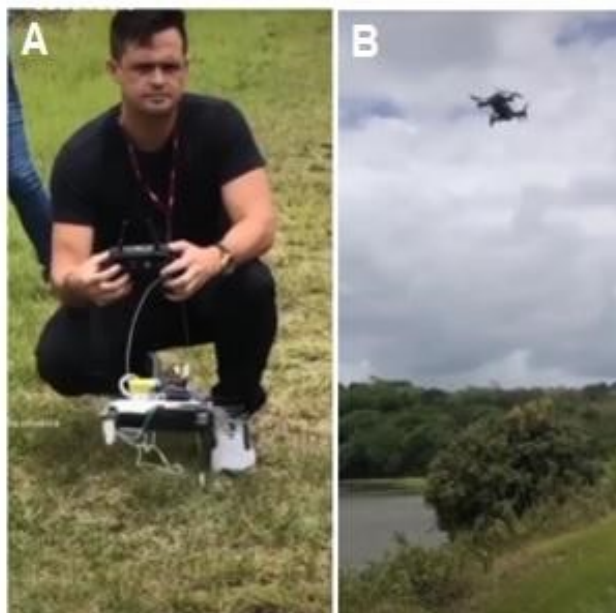

Figure S4. (A) Image of the lab-on-a-drone before the flight with the operator in control. (B) Lab-on-a-Drone flying over the region to collect water samples.

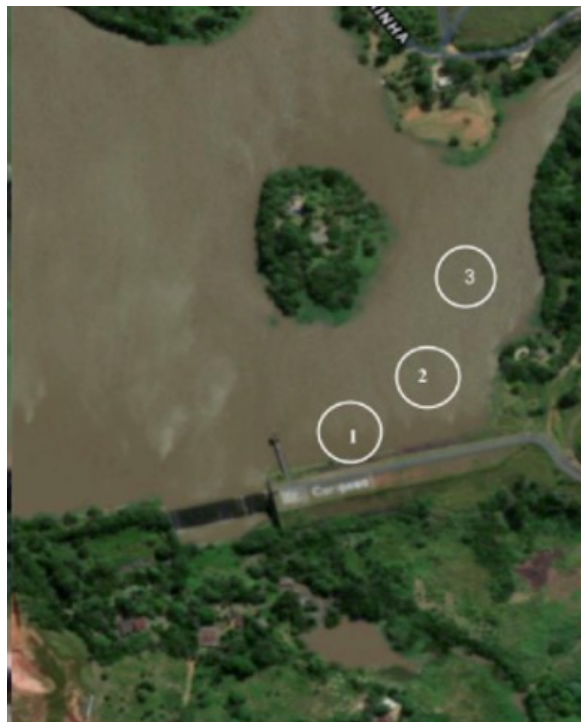

Figure S5. *In situ* analysis using the Lab-on-a-Drone. Satellite image of the Duas Una reservoir at Recife-PE-Brazil. The GPS coordinates of the sampling point 1:  $8.01^{\circ}81'33''$  S;  $34.93^{\circ}58'26''$  W; point 2:  $8.01^{\circ}93'86''$  S;  $34.93^{\circ}41'87''$  W and point 3:  $8.02^{\circ}06'50''$ S;  $34^{\circ}55'57''$  W, respectively.



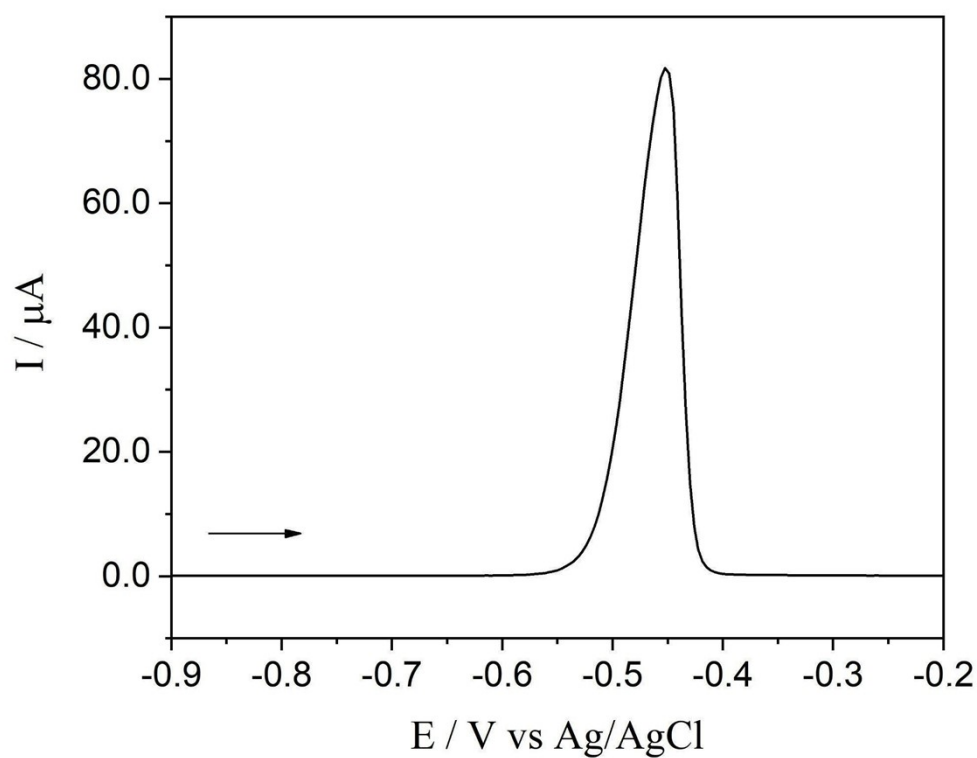

Figure S6. A plot of the DPASV data presented in Table S6 referred to a spiked water sample with  $65 \mu\text{g L}^{-1}$  of  $\text{Pb}^{2+}$  measured and transmitted using the Lab-on-a-Drone to a smartphone. SDPASV parameters: DPASV parameters: deposition potential = -1.4 V, time of deposition = 120 s, interval pulse = 200 ms, pulse width = 40 ms,  $a = 10 \text{ mV}$ ,  $\Delta E_s = 4 \text{ mV}$ .
